# Supplementary material for: A synergetic effect between photogenerated carriers and photothermally enhanced electrochemical urea-assisted hydrogen generation on the Ni-NiO/Nickel Foam catalyst
Source: Royal Society of Chemistry journal article supplement (doi:10.1039/d1ma00038a), 2021-01-01
Supplement: d1ma00038a1.pdf [file d1ma00038a1.pdf]

The supporting information for

**A synergetic effect between photogenerated carriers and photothermally enhanced electrochemical urea-assisted hydrogen generation on Ni-NiO/Nickel Foam catalyst**

*Qi Wang,<sup>a</sup> Xing Cheng,<sup>a</sup> Yukun Sun,<sup>b</sup> Zaicheng Sun,<sup>b</sup> Dong Wang,<sup>\*c</sup> Ge Chen<sup>\*a</sup> and Peter Schaaf<sup>c</sup>*

[a] Beijing Key Laboratory for Green Catalysis Separation, Department of environmental and Chemical Engineering, Faculty of Environmental and life science, Beijing University of Technology, No. 100, Ping Le Yuan, Chaoyang District, Beijing 100124, P. R. China.

[b] Beijing Key Lab for Green Catalysis and Separation, Department of Chemistry and Biology, Beijing University of Technology, Beijing 100124, China.

[c] Chair Materials for Electrical Engineering and Electronics, Institute for Materials Science and Engineering, Institute for Micro and Nanotechnologies MacroNano®, TU Ilmenau, Gustav-Kirchhoff-Str. 5, 98693 Ilmenau, Germany.

\*Corresponding author

\*E-mail: Dr. Dong Wang: [dong.wang@tu-ilmenau.de](mailto:dong.wang@tu-ilmenau.de)

\*E-mail: Dr. Ge Chen: [chenge@bjut.edu.cn](mailto:chenge@bjut.edu.cn)

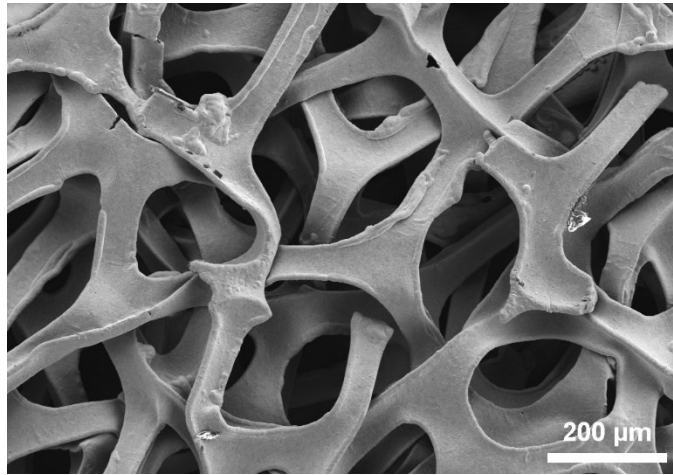

**Fig. S1.** SEM image of the Ni foam.

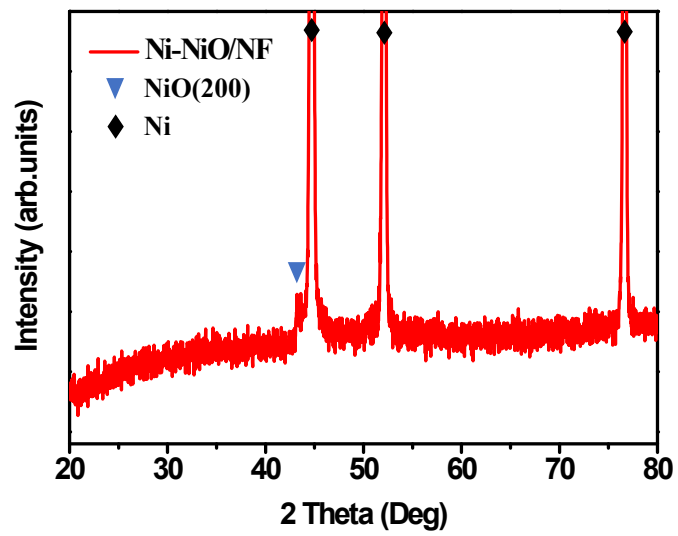

**Fig. S2.** X-ray diffraction (XRD) pattern of Ni-NiO/NF.

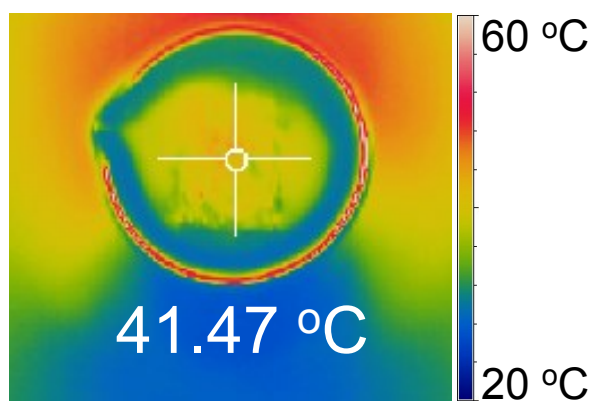

**Fig. S3.** Infrared photograph of Ni-NiO/NF at full spectrum irradiation of  $150 \text{ mW cm}^{-2}$  for 60 seconds.

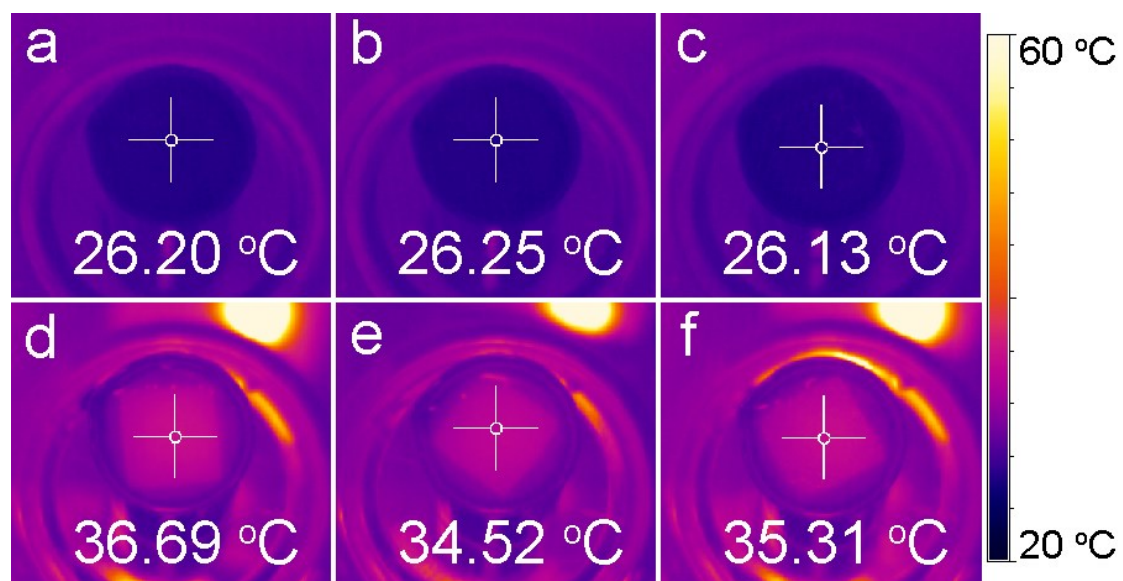

**Fig. S4.** Infrared photographs without irradiation of (a) Ni-NiO/NF, (b) Ni(OH)<sub>2</sub>/NF and (c) NF. Bottom row: same infrared photographs under full spectrum irradiation of the highest temperature of (d) Ni-NiO/NF, (e) Ni(OH)<sub>2</sub>/NF and (f) NF.

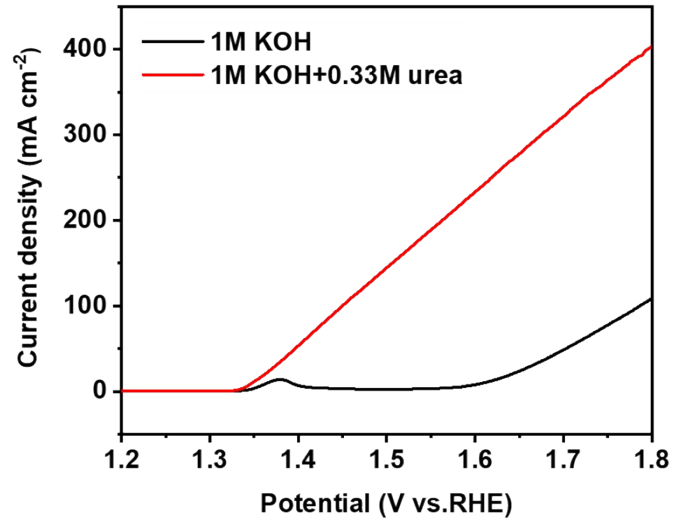

**Fig. S5.** Linear sweep voltammetry curves for the UOR and OER of Ni-NiO/NF.

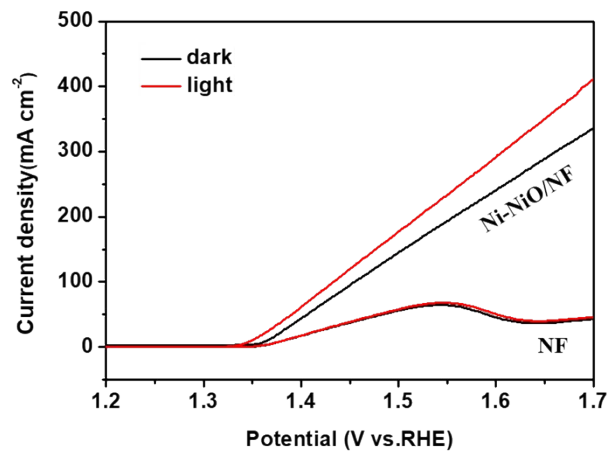

**Fig. S6.** Polarization curves for the UOR of Ni-NiO/NF and NF with and without irradiation.

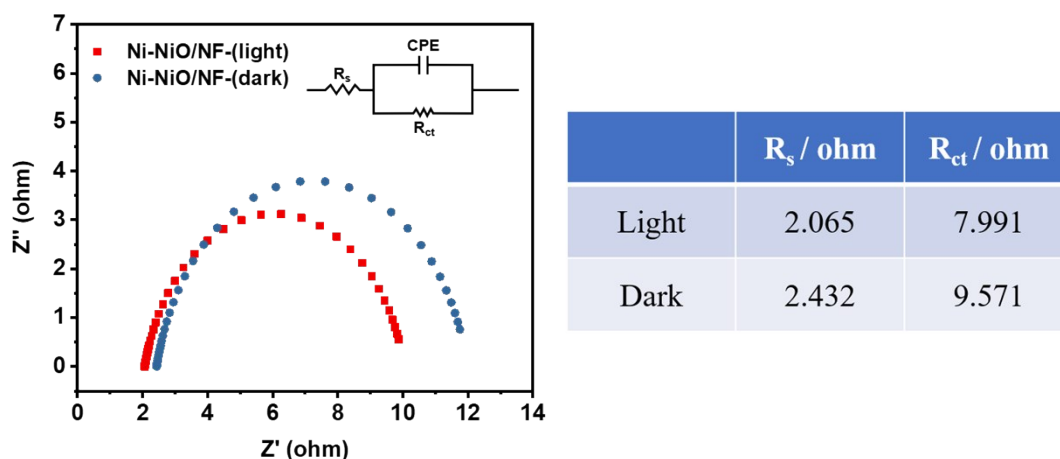

**Fig. S7.** Electrochemical impedance spectroscopy (EIS): Nyquist plots of Ni-NiO/NF electrode for UOR. The solution resistance and charge transfer resistance for Ni-NiO/NF electrode are also listed.

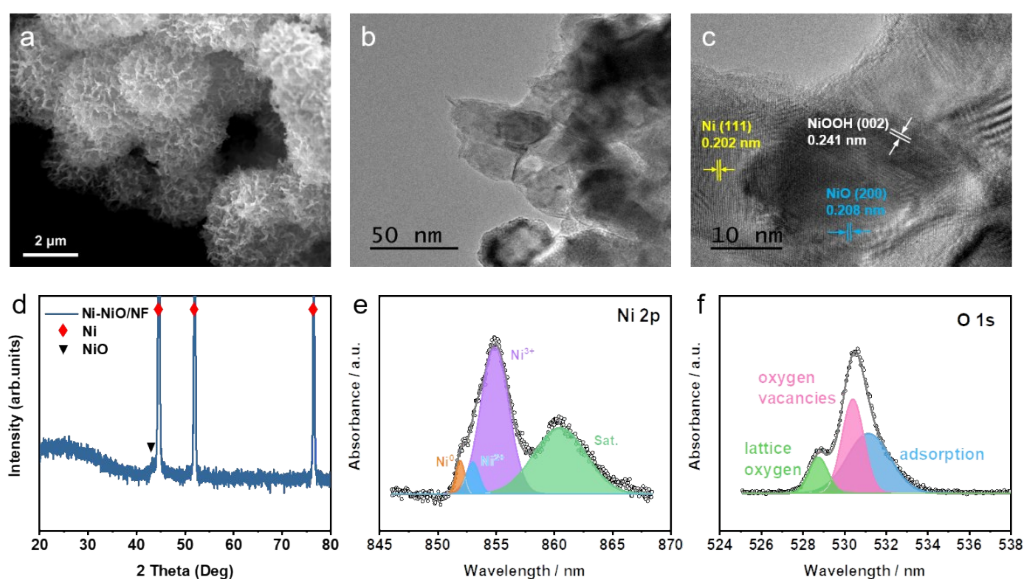

**Fig. S8.** (a) The SEM image of Ni-NiO after the durability test. (b) TEM image, (c) HRTEM image of Ni-NiO/NF after the durability test. (d) X-ray diffraction (XRD) pattern of Ni-NiO/NF after the durability test. XPS spectra of (e) Ni 2p and (f) O 1s of Ni-NiO/NF after the durability test.

**Table S1** The atomic concentration of Ni, O and C species for Ni-NiO/NF and Ni(OH)<sub>2</sub>/NF from full XPS spectrum.

| Catalysts               | % At Conc |      |      |
|-------------------------|-----------|------|------|
|                         | Ni 2p     | O 1s | C 1s |
| Ni-NiO/NF               | 36        | 40   | 24   |
| Ni(OH) <sub>2</sub> /NF | 27        | 45   | 28   |

**Table S2** Comparison of the activity of Ni-NiO/NF||Ni-NiO/NF and other reported materials in the urea-assisted electrochemical hydrogen production.

| Catalysts                                                                          | Electrolyte               | $\eta$ (mV) at $j = 10 \text{ mA cm}^{-2}$ | Cell voltage (V @ $j \text{ mA cm}^{-2}$ ) | Stability  | Reference        |
|------------------------------------------------------------------------------------|---------------------------|--------------------------------------------|--------------------------------------------|------------|------------------|
| <b>Ni-NiO/NF  Ni-NiO/NF</b>                                                        | <b>1 M KOH+0.33M Urea</b> | <b>1.48</b>                                | <b>1.7@60</b>                              | <b>5 h</b> | <b>This work</b> |
| NF@Acid-H <sub>2</sub>   NF@Acid-H <sub>2</sub>                                    | 1 M KOH+0.5 M Urea        | 1.49                                       | 1.62@50                                    | 20 h       | 1                |
| 1% Cu: $\alpha$ -Ni(OH) <sub>2</sub> /NF  1% Cu: $\alpha$ -Ni(OH) <sub>2</sub> /NF | 1 M KOH+0.33 M Urea       | 1.49                                       | 1.74@60                                    | 40 h       | 2                |
| Ni <sub>4</sub> N/Cu <sub>3</sub> N/CF  Ni <sub>4</sub> N/Cu <sub>3</sub> N/CF     | 1 M KOH+0.5 M Urea        | 1.48                                       | 1.7@50                                     | 10 h       | 3                |
| Ni-Co <sub>9</sub> S <sub>8</sub> /CC  Ni-Co <sub>9</sub> S <sub>8</sub> /CC       | 1 M KOH+0.33 M Urea       | 1.52                                       | 1.76@60                                    | 20 h       | 4                |
| CoMn/CoMn <sub>2</sub> O <sub>4</sub>   CoMn/CoMn <sub>2</sub> O <sub>4</sub>      | 1 M KOH+0.5 M Urea        | 1.51                                       | 1.68@100                                   | 60000s     | 5                |
| Pt/C  RuO <sub>2</sub>                                                             | 1 M KOH+0.33 M Urea       | 1.53                                       | --                                         | --         | 6                |

|                                                                                                             |                          |      |         |      |   |
|-------------------------------------------------------------------------------------------------------------|--------------------------|------|---------|------|---|
| MnO <sub>2</sub> /MnCo <sub>2</sub> O <sub>4</sub>   <br>MnO <sub>2</sub> /MnCo <sub>2</sub> O <sub>4</sub> | 1 M<br>KOH+0.5 M<br>Urea | 1.58 | 1.85@60 | 15 h | 7 |
| NiMoS  NiMoS                                                                                                | 1 M<br>KOH+0.5 M<br>Urea | 1.59 | 2@120   | 10 h | 8 |
| NF-Pt/C  NF-Pt/C                                                                                            | 1 M<br>KOH+0.5 M<br>Urea | 1.68 | --      | --   | 9 |
| Pt/C-IrO <sub>2</sub>   <br>Pt/C-IrO <sub>2</sub>                                                           | 1 M<br>KOH+0.5 M<br>Urea | 1.72 | --      | --   | 9 |

## References

- 1 B. Zhang, S. Wang, Z. Ma and Y. Qiu, *Applied Surface Science*, 2019, **496**, 143710.
- 2 J. Xie, L. Gao, S. Cao, W. Liu, F. Lei, P. Hao, X. Xia and B. Tang, *Journal of Materials Chemistry A*, 2019, **7**, 13577-13584.
- 3 J. Li, C. Yao, X. Kong, Z. Li, M. Jiang, F. Zhang and X. Lei, *ACS Sustainable Chemistry & Engineering*, 2019, **7**, 13278-13285.
- 4 P. Hao, W. Zhu, L. Li, J. Tian, J. Xie, F. Lei, G. Cui, Y. Zhang and B. Tang, *Electrochimica Acta*, 2020, **338**, 135883.
- 5 C. Wang, H. Lu, Z. Mao, C. Yan, G. Shen and X. Wang, *Advanced Functional Materials*, 2020, **30**, 2000556.
- 6 Q. Liu, L. Xie, F. Qu, Z. Liu, G. Du, A. M. Asiri and X. Sun, *Inorganic Chemistry Frontiers*, 2017, **4**, 1120-1124.
- 7 C. Xiao, S. Li, X. Zhang and D. R. MacFarlane, *Journal of Materials Chemistry A*, 2017, **5**, 7825-7832.
- 8 X. Wang, J. Wang, X. Sun, S. Wei, L. Cui, W. Yang and J. Liu, *Nano Research*, 2018, **11**, 988-996.
- 9 S. Chen, J. Duan, A. Vasileff and S. Z. Qiao, *Angewandte Chemie International Edition*, 2016, **55**, 3804-3808.
